# Supplementary material
Source: PubMed Central journal article supplement (PMC6374777)
Supplement: NIHMS1518519-supplement-1.pdf [file NIHMS1518519-supplement-1.pdf]

## SUPPLEMENTAL INFORMATION

### **The Influence of Molecular Structure on the Adsorption of PFAS to Fluid-Fluid Interfaces: Using QSPR to Predict Interfacial Adsorption Coefficients**

Mark L Brusseau<sup>1,2</sup>

<sup>1</sup>Soil, Water, and Environmental Science Department,

<sup>2</sup>Hydrology and Atmospheric Sciences Department

School of Earth and Environmental Sciences

University of Arizona

Tucson, AZ 85721

Prepared for:

***Water Research***

December 2018

Content:

One table

One figure

References

Table S1. Data included in study, along with acronyms and literature source (see notes below).

| Acronym  | Formula                                                                                                                                                        | Perfluorocarboxylates                      | Surface/Interfacial Tension Data Source    |
|----------|----------------------------------------------------------------------------------------------------------------------------------------------------------------|--------------------------------------------|--------------------------------------------|
| PFAA     | CF <sub>3</sub> CO <sub>2</sub> Na                                                                                                                             | Na-Perfluoroacetate                        | Tamaki 1989                                |
| PFPrA    | C <sub>2</sub> F <sub>5</sub> CO <sub>2</sub> Na                                                                                                               | Na-Perfluoropropanoate                     | Tamaki 1989                                |
| PFBA     | C <sub>3</sub> F <sub>7</sub> CO <sub>2</sub> Na                                                                                                               | Na-Perfluorobutanoate                      | Tamaki 1989                                |
| PFPeA    | C <sub>4</sub> F <sub>9</sub> CO <sub>2</sub> Na                                                                                                               | Na-Perfluoropentanoate                     | Tamaki 1989                                |
| PFHxA    | C <sub>5</sub> F <sub>11</sub> CO <sub>2</sub> Na                                                                                                              | Na-Perfluorohexanoate                      | Lunkenheimer 2015                          |
| PFHpA    | C <sub>6</sub> F <sub>13</sub> CO <sub>2</sub> Na                                                                                                              | Na-Perfluoroheptanoate                     | Lunkenheimer 2015/Tamaki 1989              |
| PFOA     | C <sub>7</sub> F <sub>15</sub> CO <sub>2</sub> Na                                                                                                              | Na-Perfluorooctanoate                      | Mean of 9 literature data sets             |
| PFNA     | C <sub>8</sub> F <sub>17</sub> CO <sub>2</sub> Na                                                                                                              | Na-Perfluorononanoate                      | Lunkenheimer 2015/Downer 1999/Dmowski 1990 |
| PFDA     | C <sub>9</sub> F <sub>19</sub> CO <sub>2</sub> Na                                                                                                              | Na-Perfluorodecanoate                      | Lunkenheimer 2015                          |
| PFUnA    | C <sub>10</sub> F <sub>21</sub> CO <sub>2</sub> Na                                                                                                             | Na-Perfluoroundecanoate                    | Lunkenheimer 2015                          |
|          |                                                                                                                                                                |                                            |                                            |
|          |                                                                                                                                                                | <b>Branched PFCAs</b>                      |                                            |
| Iso-PFOA | (CF <sub>3</sub> ) <sub>2</sub> CF(CF <sub>2</sub> ) <sub>4</sub> CO <sub>2</sub> Na                                                                           | Na perfluoro-methyl-heptanoate             | Meissner 1992/Shinoda 1972                 |
| Iso-PFDA | (CF <sub>3</sub> ) <sub>2</sub> CF(CF <sub>2</sub> ) <sub>6</sub> CO <sub>2</sub> Na                                                                           | Na-perfluoro-methyl-nonanoate              | Meissner 1992                              |
|          |                                                                                                                                                                |                                            |                                            |
|          |                                                                                                                                                                | <b>Perfluorosulfonates</b>                 |                                            |
| PFBS     | C <sub>4</sub> F <sub>9</sub> SO <sub>3</sub> K                                                                                                                | K-Perfluorobutanesulfonate                 | Campbell 2009                              |
| PFHxS    | C <sub>6</sub> F <sub>13</sub> SO <sub>3</sub> K                                                                                                               | K-Perfluorohexanesulfonate                 | Campbell 2009                              |
| PFHpS    | C <sub>7</sub> F <sub>15</sub> SO <sub>3</sub> Na                                                                                                              | Na-Perfluoroheptanesulfonate               | Shinoda 1972                               |
| PFOS     | C <sub>8</sub> F <sub>17</sub> SO <sub>3</sub> K                                                                                                               | K-Perfluorooctanesulfonate                 | Shinoda 1972                               |
| PFNS     | C <sub>9</sub> F <sub>19</sub> SO <sub>3</sub> K                                                                                                               | K-Perfluorononanesulfonate                 | Shinoda 1972                               |
|          |                                                                                                                                                                |                                            |                                            |
|          |                                                                                                                                                                | <b>Polyfluoroalkyls</b>                    |                                            |
| 9H-PFNA  | C <sub>8</sub> H <sub>F</sub> 16CO <sub>2</sub> Na                                                                                                             | Na-9H Hexadecafluorononanoate              | Downer 1999                                |
| 7H-PFHpA | C <sub>6</sub> H <sub>F</sub> 12CO <sub>2</sub> NH <sub>4</sub>                                                                                                | NH <sub>4</sub> -7H-dodecafluoroheptanoate | Bernett 1959                               |
| SPBS     | C <sub>9</sub> F <sub>17</sub> OC <sub>6</sub> H <sub>4</sub> SO <sub>3</sub> Na                                                                               | Na-p-perfluorononyloxy benzene sulfonate   | Chen 2011                                  |
| FC-53    | CF <sub>3</sub> (CF <sub>2</sub> ) <sub>5</sub> O(CF <sub>2</sub> ) <sub>2</sub> SO <sub>3</sub> K                                                             | K-3-oxa-perfluorononane-sulfonate          | He 1996                                    |
| TDFHD    | CF <sub>3</sub> (CF <sub>2</sub> ) <sub>3</sub> CF(CF <sub>3</sub> )(CH <sub>2</sub> ) <sub>10</sub> CO <sub>2</sub> Na                                        | Na-tridecafluorohexadecanoate              | Brace 1962                                 |
| F9-CTAB  | CF <sub>3</sub> (CF <sub>2</sub> ) <sub>3</sub> (CH <sub>2</sub> ) <sub>11</sub> N(CH <sub>3</sub> ) <sub>3</sub> Br                                           | Nonafluoropentadecyl-CTAB                  | Jackson 2015                               |
| F12-CTAB | (CF <sub>3</sub> ) <sub>2</sub> (CF <sub>2</sub> ) <sub>3</sub> (CH <sub>2</sub> ) <sub>10</sub> N(CH <sub>3</sub> ) <sub>3</sub> Br                           | Dodecafluoropentadecyl-CTAB                | Jackson 2015                               |
| F17-CTAB | CF <sub>3</sub> (CF <sub>2</sub> ) <sub>7</sub> (CH <sub>2</sub> ) <sub>6</sub> N(CH <sub>3</sub> ) <sub>3</sub> Br                                            | Heptadecafluorotetradecyl-CTAB             | Jackson 2015                               |
| UDFOS    | CF <sub>3</sub> (CF <sub>2</sub> ) <sub>3</sub> CH <sub>2</sub> CF <sub>2</sub> (CH <sub>2</sub> ) <sub>2</sub> SO <sub>3</sub> Na                             | Na-undecafluorooctanesulfonate             | Peng 2012                                  |
| NFHES    | CF <sub>3</sub> CF <sub>2</sub> O(CF <sub>2</sub> ) <sub>2</sub> (CH <sub>2</sub> ) <sub>2</sub> SO <sub>3</sub> Na                                            | Na-nonafluorohexylethersulfonate           | Peng 2012                                  |
| UDFHES   | CF <sub>3</sub> (CF <sub>2</sub> ) <sub>2</sub> O(CF <sub>2</sub> ) <sub>2</sub> (CH <sub>2</sub> ) <sub>2</sub> SO <sub>3</sub> Na                            | Na-undecafluoroheptylethersulfonate        | Peng 2012                                  |
| TDFP     | CF <sub>3</sub> (CF <sub>2</sub> ) <sub>2</sub> C(CF <sub>3</sub> ) <sub>2</sub> CH <sub>2</sub> CO <sub>2</sub> Na                                            | Na-tridecafluoropentanoate                 | Dmowski 1990                               |
| TDHP     | CF <sub>3</sub> (CF <sub>2</sub> ) <sub>2</sub> C(CF <sub>3</sub> ) <sub>2</sub> (CH <sub>2</sub> ) <sub>2</sub> CO <sub>2</sub> Na                            | Na-tridecafluorohexanoate                  | Dmowski 1990                               |
| HDFPEC   | CF <sub>3</sub> (CF <sub>2</sub> ) <sub>2</sub> OCF(CF <sub>3</sub> )CF <sub>2</sub> OCF(CF <sub>3</sub> )CO <sub>2</sub> Na                                   | Na-heptadecafluoropolyether carboxylate    | Yin 2016                                   |
| TDFBP    | CF <sub>3</sub> (CF <sub>2</sub> ) <sub>2</sub> C(CF <sub>3</sub> ) <sub>2</sub> CH <sub>2</sub> C <sub>6</sub> H <sub>4</sub> PO <sub>3</sub> Li <sub>2</sub> | Li-tridecafluoropentylbenzene phosphonate  | Sha 2014                                   |

Table S1. Continued.

| <b>Nonionic PFAS</b> |                                                                                                                                                                             |                                              |                     |
|----------------------|-----------------------------------------------------------------------------------------------------------------------------------------------------------------------------|----------------------------------------------|---------------------|
| TDFTE                | CF <sub>3</sub> (CF <sub>2</sub> ) <sub>5</sub> C <sub>2</sub> H <sub>4</sub> SC <sub>2</sub> H <sub>4</sub> (CH <sub>2</sub> CH <sub>2</sub> O) <sub>2</sub> OH            | Tridecafluoro thiodiethoxylate               | Matos 1989          |
| TDFTE                | CF <sub>3</sub> (CF <sub>2</sub> ) <sub>5</sub> C <sub>2</sub> H <sub>4</sub> SC <sub>2</sub> H <sub>4</sub> (CH <sub>2</sub> CH <sub>2</sub> O) <sub>3</sub> OH            | Tridecafluoro thiotriethoxylate              | Matos 1989          |
| TDFTE                | CF <sub>3</sub> (CF <sub>2</sub> ) <sub>5</sub> C <sub>2</sub> H <sub>4</sub> SC <sub>2</sub> H <sub>4</sub> (CH <sub>2</sub> CH <sub>2</sub> O) <sub>5</sub> OH            | Tridecafluoro thiopentaethoxylate            | Matos 1989          |
| PFOA-amide           | CF <sub>3</sub> (CF <sub>2</sub> ) <sub>6</sub> CONHCH <sub>2</sub> CH <sub>3</sub> CHOH                                                                                    | N-(2-hydroxypropyl)perfluorooctane amide     | Dai 2013            |
| NFTME                | CF <sub>3</sub> (CF <sub>2</sub> ) <sub>3</sub> CH <sub>2</sub> O(CH <sub>2</sub> CH <sub>2</sub> O) <sub>3</sub> CH <sub>3</sub>                                           | Nonafluoro triethyleneoxide methyl ether     | Eastoe 2001         |
| TDFTE                | CF <sub>3</sub> (CF <sub>2</sub> ) <sub>5</sub> CH <sub>2</sub> O(CH <sub>2</sub> CH <sub>2</sub> O) <sub>3</sub> CH <sub>3</sub>                                           | Tridecafluoro triethyleneoxide methyl ether  | Eastoe 2001         |
| HOFTME               | CF <sub>2</sub> H(CF <sub>2</sub> ) <sub>3</sub> CH <sub>2</sub> O(CH <sub>2</sub> CH <sub>2</sub> O) <sub>3</sub> CH <sub>3</sub>                                          | H-octafluoro triethyleneoxide methyl ether   | Eastoe 2001         |
| HDDFTME              | CF <sub>2</sub> H(CF <sub>2</sub> ) <sub>5</sub> CH <sub>2</sub> O(CH <sub>2</sub> CH <sub>2</sub> O) <sub>3</sub> CH <sub>3</sub>                                          | H-dodecafluoro triethyleneoxide methyl ether | Eastoe 2001         |
| <b>Alcohols</b>      |                                                                                                                                                                             |                                              |                     |
| 8:1 FTOH             | CF <sub>3</sub> (CF <sub>2</sub> ) <sub>7</sub> CH <sub>2</sub> OH                                                                                                          | 8:1 Fluorotelomer alcohol                    | Casandra 2018       |
| FC8diol              | (CF <sub>2</sub> ) <sub>6</sub> (CH <sub>2</sub> ) <sub>2</sub> (OH) <sub>2</sub>                                                                                           | Perfluorooctane-1,8-diol                     | Takiue 2009         |
| <b>Hydrocarbons</b>  |                                                                                                                                                                             |                                              |                     |
| SDBS                 | C <sub>18</sub> H <sub>29</sub> SO <sub>3</sub> Na                                                                                                                          | Na-dodecylbenzene sulfonate                  | Zimoch 1999         |
| SDS                  | C <sub>12</sub> H <sub>25</sub> SO <sub>4</sub> Na                                                                                                                          | Na-dodecyl sulfate                           | Zdziennicka 2012    |
| CTAB                 | C <sub>19</sub> H <sub>42</sub> NBr                                                                                                                                         | Hexadecyltrimethylammonium bromide           | Nakahara 2011       |
| Triton 45            | (CH <sub>3</sub> ) <sub>3</sub> CCH <sub>2</sub> C(CH <sub>3</sub> ) <sub>2</sub> C <sub>6</sub> H <sub>4</sub> -(OCH <sub>2</sub> CH <sub>2</sub> ) <sub>n</sub> OH, n=4.5 | Octylphenol Ethoxylate                       | Fainerman 2009      |
| <b>OIL-Water</b>     |                                                                                                                                                                             |                                              |                     |
| PFOA                 | C <sub>7</sub> F <sub>15</sub> CO <sub>2</sub> Cs                                                                                                                           | Cs-PFOA Decane-Water                         | Janczuk 1997        |
| PFOA                 | C <sub>7</sub> F <sub>15</sub> CO <sub>2</sub> Cs                                                                                                                           | Cs-PFOA Benzene-Water                        | Janczuk 1997        |
| PFOA                 | C <sub>7</sub> F <sub>15</sub> CO <sub>2</sub> Na                                                                                                                           | Na-PFOA Heptane-Water                        | Dmowski 1990        |
| PFNA                 | C <sub>8</sub> F <sub>17</sub> CO <sub>2</sub> Na                                                                                                                           | Na-PFNA Heptane-Water                        | Dmowski 1990        |
| TDFP                 | CF <sub>3</sub> (CF <sub>2</sub> ) <sub>2</sub> C(CF <sub>3</sub> ) <sub>2</sub> CH <sub>2</sub> CO <sub>2</sub> Na                                                         | Na-TDFP Heptane-Water                        | Dmowski 1990        |
| TDHP                 | CF <sub>3</sub> (CF <sub>2</sub> ) <sub>2</sub> C(CF <sub>3</sub> ) <sub>2</sub> (CH <sub>2</sub> ) <sub>2</sub> CO <sub>2</sub> Na                                         | Na-TDHP Heptane-Water                        | Dmowski 1990        |
| SDBS                 | C <sub>18</sub> H <sub>29</sub> SO <sub>3</sub> Na                                                                                                                          | SDBS Tetrachloroethene-Water                 | Kim 1999/Zhong 2016 |
| SDBS                 | C <sub>18</sub> H <sub>29</sub> SO <sub>3</sub> Na                                                                                                                          | SDBS Decane-Water                            | Kim 1999            |

Note 1: The number of citations listed under the data source for a given PFAS reflects the number of data sets available for that specific compound.

Note 2: Data sources for Na-PFOA are An et al., 1996, Chen et al. 2005, Dmowski et al., 1990, Lopez-Fontan et al. 2005, Lunkenheimer et al. 2015, Lunkenheimer et al. 2017, Lyu et al., 2018 (denoted as “UAZ” in Figure 1), Shinoda et al. 1972, and Tamaki et al. 1989.

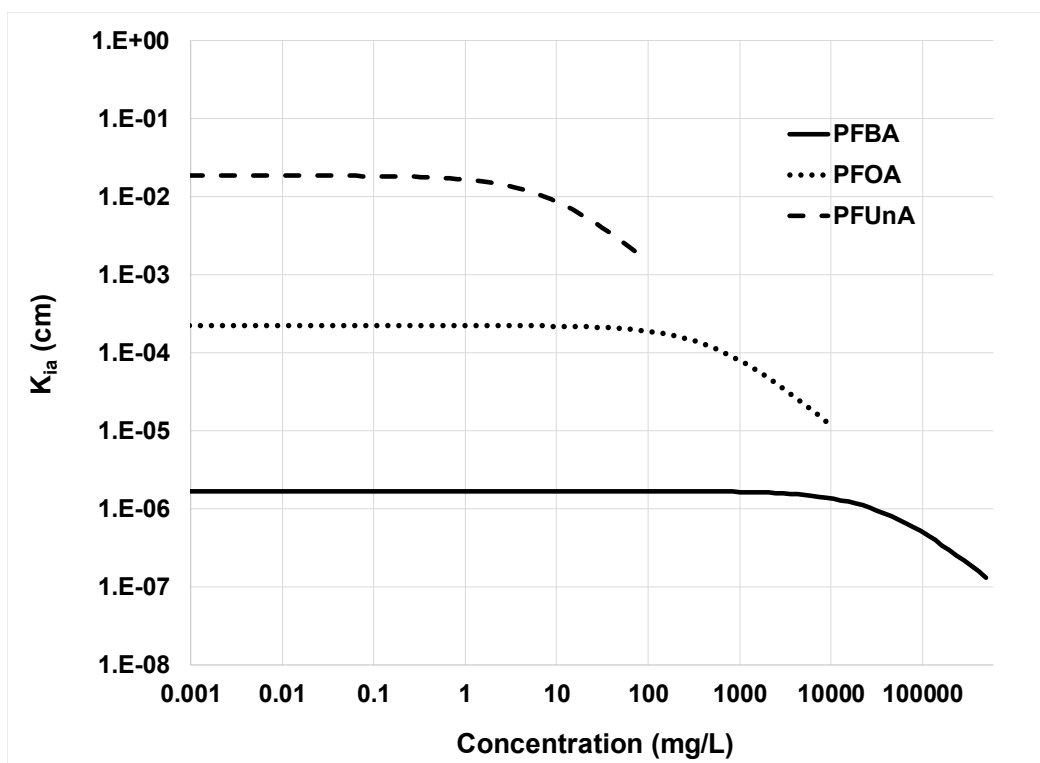

Figure S1. Air-water interfacial adsorption coefficient ( $K_{ia}$ ) versus solution concentration of three selected PFAS (Na-forms as reported in Table S1). Acronyms referenced to Table S1.

## References

- An, S.W., Lu, J.R., Thomas, R.K., 1996. Apparent anomalies in surface excesses determined from neutron reflections and the gibbs equation in anionic surfactants with particular reference to perfluorooctanoates at the air/water interface. *Langmuir* 12, 2446-2453.
- Bernett, M.K., Zisman, W.A., 1959. Wetting of Low-Energy Solids by Aqueous Solution of Highly Fluorinated Acids and Salts. *Journal of Physical Chemistry* 63(11), 1911-1916.
- Brace, N.O., 1962. Long chain alkanolic and alkenolic acids with perfluoroalkyl terminal segments. *Research and Development Division Contribution* 308(27), 4491-4498.
- Campbell, T.Y., Vecitis, C.D., Mader, B.T., Hoffman, M.R., 2009. Perfluorinated surfactant chain-length effects on sonochemical kinetics. *J. Phys. Chem. A* 113, 9834-9842.
- Cassandra, A., Noskov, B.A., Hu, M., Lin, S., 2018. Adsorption kinetics of heptadecafluoro-1-nonanol: Phase transition and mixed control. *Journal of Colloid and Interface Science* 527, 49-56
- Chen, J., Yan, Peng., Chen, W., Jin-Xin, X., 2005. Effect of counterions on fluorinated surfactants. *Acta Chimica Sinica* 63, 279-282.
- Chen, L., Shi, H., Wu, H., Xiang, J., 2011. Synthesis and combined properties of novel fluorinated anionic surfactant. *Colloids and Surfaces A: Physicochemical and Engineering Aspects* 384, 331-336.
- Dai, C., Du, M., Zhao, M., You, Q., Guan, B., Wang, X., Liu, P., 2013. Study of micelle formation by fluorocarbon surfactant *N*-(2-hydroxypropyl) perfluorooctane amide in aqueous solution. *The Journal of Physical Chemistry* 117, 9922-9928.
- Downer, A., Eastoe, J. Pitt, A. R., Penfold, J., Heenan, R. K., 1999. Adsorption and micellisation of partially- and full- fluorinated surfactants. *Colloids and Surfaces* 156, 33-48.
- Dmowski, W. Plenkiewicz, H., and Piasecka-Maciejewska, K. 1990. Synthetic utility of 3-(perfluoro-1,1-dimethylbutyl)-1-propene. Part III. Synthesis and properties of (perfluoro-1,1-dimethylbutyl) acetic and propionic acids and their salts. *Journal of Fluorine Chemistry* 48, 77-84.
- Eastoe, J., Paul, A., Rankin, A., and Wat, R. 2001. Fluorinated nonionic surfactants bearing either CF<sub>3</sub>- or H-CF<sub>2</sub>- terminal groups: Adsorption at the Surface of aqueous solutions. *Langmuir* 17, 7873-7878.
- Fainerman, V.B., Lylyka, S.V., Aksenokob, E.V., Makievski, A.V., Petkovd, J.T., Yorkee, J., and Miller, R. 2009. Adsorption layer characteristics of Triton surfactants 1. Surface tension and adsorption isotherms. *Colloids and Surfaces A: Physicochem. Eng. Aspects* 334, 1-7.
- He, S. and Guoxi, Z., 1996. Effect of organic ammonium salts on the surface activity and solubility of fluorocarbon surfactant. *Acta Physico-Chimica Sinica* 12, 976-980.
- Jackson, A. J., Dong, C. C., Thomas, R. K., Penfold, J., 2015. Unusual excess free energies of mixing in mixtures of partially fluorinated and hydrocarbon surfactants at the air-water interface: correlation with the structure of the layer. *Langmuir* 31, 272-282.
- Janczuk, B., Mendez Sierra, J. A., Gonzalez-Martin, M. L., Bruque, J. M., Wojcik, W., 1997. Properties of decylammonium chloride and cesium perfluorooctanoate at interfaces and standard free energy of their adsorption. *Journal of Colloid and Interface Science* 192, 408-414.
- Kim, H., Rao, P.S.C., Annable, M.D., 1999. Consistency of the interfacial tracer technique: experimental evaluation. *Journal of Contaminant Hydrology* 40, 79-94.
- López-Fontán, J.L., Sarmiento, F., Schulz, P.C., 2005. The aggregation of sodium perfluorooctanoate in water. *Colloid and Polymer Science* 283, 862-871.

- Lunkenheimer, K., Prescher, D., Hirte, R., Geggel, K., 2015. Adsorption properties of surface chemically pure sodium perfluoro-*n*-alkanoates at the air/water interface: Counterion effects within homologous series of 1:1 ionic surfactants. *Langmuir* 31, 970-981.
- Lunkenheimer, K., Geggel, K., Prescher, D., 2017. Role of counterion in the adsorption behaviour of 1:1 ionic surfactants at fluid interfaces – Adsorption properties of alkali perfluoro-*n*-octanoates at the air/water interface. *Langmuir* 33, 10216-10224.
- Lyu, Y., M.L. Brusseau, W. Chen, N. Yan, X. Fu, and X. Lin. 2018. Adsorption of PFOA at the air-water interface during transport in unsaturated porous media. *Environmental Science & Technology* 52, 7745-7753.
- Matos, L., Ravey, J., Serratrice, G., 1989. Surface tension properties of aqueous new nonionic fluorinated surfactants. *Journal of Colloid and Interface Science* 128, 341-347.
- Meissner, E., Myszkowski, J., Szymanowski, J., Sobczynska., 1992. Synthesis and surface activity of sodium salts of branched perfluorocarboxylic acids and their analogs containing one chlorine atom. *Journal of Chemical Technology & Biotechnology* 55, 273-276.
- Nakahara, H., Shibata, O., and Moroi, Y. 2011. Examination of surface adsorption of cetyltrimethylammonium bromide and sodium dodecyl sulfate. *The Journal of Physical Chemistry B* 115, 9077-9086.
- Peng, S. and Hung, M., 2012. Fluorinated sulfonate surfactants. *Journal of Fluorine Chemistry* 133, 77-85.
- Sha, M., Pan, R., Zhan, L., Xing, P., and Jiang, B. 2014. Synthesis and surface activity study of a novel branched fluorinated anion surfactant with CF<sub>3</sub>CF<sub>2</sub>CF<sub>2</sub>C(CF<sub>3</sub>)<sub>2</sub> group. *Chinese Journal of Chemistry* 32, 995-998.
- Shinoda, K., Hato, M., Hayashi, T., 1972. The physicochemical properties of aqueous solutions of fluorinated surfactants. *Journal of Physical Chemistry* 76, 909-914.
- Takiue, T., Nakamura, F., Murakami, D., Fukuda, T., Shuto, A., Matsubara, H., Aratono, M., 2009. Molecular orientation and multilayer formation of 1H, 1H, 8H, 8H-Perfluorooctane-1, 8-diol at the air/water interface. *Journal of Physical Chemistry* 113, 6305-6310.
- Tamaki, K., Ohara, Y., Watanabe, S., 1989. Solution properties of sodium perfluorooctanoates. heats of solution, viscosity *B* coefficients, and surface tensions. *Bulletin of the Chemical Society of Japan* 62, 2497-2501.
- Yin, Q., Xue, W., Bai, Y., Wang, W., Ma, X., Du, Z., and Wang, G. 2016. Micellization and aggregation properties of sodium perfluoropolyether carboxylate in aqueous solution. *Journal of Industrial and Engineering Chemistry* 42, 63-68.
- Zdziennicka, A., Szymczyk, K., Krawczyk, J., Janczuk, B., 2012. Activity and thermodynamic parameters of some surfactants adsorption at water-air interface. *Fluid Phase Equilibria* 318, 25-33.
- Zhong, H., El Ouni, A., Lin, D., Wang, B., and Brusseau, M.L. 2016. The two-phase flow IPTT method for measurement of nonwetting-wetting liquid interfacial areas at higher nonwetting saturations in natural porous media, *Water Resources Research* 52, 5506–5515.
- Zimoch, J., Blaszcak, J., Szarzynska, K., Hreczuch, W., Szymanowski J., 1999. Surface activity of mixtures of narrow-range distributed alcohol oxyethylates and sodium dodecylbenzenesulfonate. *Journal of Surfactants and Detergents* 2, 473-481.
